# Supplementary material
Source: PubMed Central journal article supplement (PMC3585481)
Supplement: Supp_Table1.pdf [file Supp_Table1.pdf]

SUPPLEMENTARY TABLE S1. THE COMPOSITION OF HEMATOPOIETIC (CD45<sup>+</sup>) CELLS IN THE SVF AND PB WAS EVALUATED BY FLOW CYTOMETRY

| CD45 | CD14 | CD206 | FSC  | SSC    | Suspected cell type                                    | Proportion to CD45 <sup>+</sup> cells [%] |           |
|------|------|-------|------|--------|--------------------------------------------------------|-------------------------------------------|-----------|
|      |      |       |      |        |                                                        | SVF (n=6)                                 | PB (n=4)  |
| +    | +    | +     | High | Medium | CD206 <sup>+</sup> adipose tissue-resident macrophages | 31.7±7.8                                  | 0.07±0.05 |
| +    | +    | -     | High | Medium | Monocytes/Macrophages                                  | 4.4±0.9                                   | 4.5±1.6   |
| ++   | -    | -     | Low  | Low    | Lymphocytes                                            | 34.9±6.5                                  | 28.9±8.8  |
| +    | -    | -     | High | High   | Granulocytes                                           | 19.3±5.6                                  | 54.7±3.1  |

SVF, stromal vascular fraction; PB, peripheral blood; FSC, forward scatter; SSC, side scatter.
