# Supplementary material
Source: PubMed Central journal article supplement (PMC3585481)
Supplement: Supp_Table2.pdf [file Supp_Table2.pdf]

SUPPLEMENTARY TABLE S2. THE COMPOSITION OF LYMPHOCYTE CELLS IN THE SVF AND PB WAS EVALUATED BY FLOW CYTOMETRY

| CD45 | CD3 | CD8 | CD45RA | CD45RO | CD19 | CD56 | Suspected cell type | Proportion to CD45+ cells [%] |          |
|------|-----|-----|--------|--------|------|------|---------------------|-------------------------------|----------|
|      |     |     |        |        |      |      |                     | SVF (n=3-5)                   | PB (n=4) |
| +    | +   |     |        |        |      |      | T cell              | 30.0±4.7                      | 32.4±8.3 |
| +    | +   |     | +      | -      |      |      | Naïve T cell        | 6.7±0.7                       | 21.9±3.5 |
| +    | +   |     | -      | +      |      |      | Memory T cell       | 22.5±7.7                      | 12.0±4.4 |
| +    |     | +   |        |        |      |      | Cytotoxic T cell    | 10.6±2.5                      | 19.7±2.7 |
| +    |     |     |        |        | +    |      | B cell              | 1.5±0.4                       | 3.1±0.6  |
| +    |     |     |        |        |      | +    | NK cell             | 10.1±0.8                      | 6.5±0.9  |

NK, natural killer.
