# Supplementary material
Source: PubMed Central journal article supplement (PMC3585481)
Supplement: Supp_Table3.pdf [file Supp_Table3.pdf]

SUPPLEMENTARY TABLE S3. GO ANALYSIS OF GENES WITH 5 TIMES HIGHER EXPRESSION IN CD34<sup>+</sup>/CD206<sup>+</sup> ATMs COMPARED TO CD34<sup>-</sup>/CD206<sup>+</sup> ATMs IS SHOWN

| <i>GO Term</i>                              | <i>Corrected P-value</i> |
|---------------------------------------------|--------------------------|
| Extracellular matrix organization           | 2.07E-08                 |
| Extracellular structure organization        | 2.07E-08                 |
| Vasculature development                     | 1.25E-07                 |
| Translation                                 | 2.50E-07                 |
| Blood vessel development                    | 3.69E-07                 |
| Cardiovascular system development           | 6.17E-06                 |
| Circulatory system development              | 6.17E-06                 |
| Cell adhesion                               | 2.60E-05                 |
| Biological adhesion                         | 2.68E-05                 |
| Macromolecule biosynthetic process          | 4.01E-05                 |
| Anatomical structure morphogenesis          | 9.24E-05                 |
| Anatomical structure development            | 1.06E-04                 |
| System development                          | 1.56E-04                 |
| Skeletal system development                 | 2.64E-04                 |
| Regulation of cell migration                | 2.64E-04                 |
| Blood vessel morphogenesis                  | 2.82E-04                 |
| Regulation of cell motility                 | 3.64E-04                 |
| Biosynthetic process                        | 3.78E-04                 |
| Cell migration                              | 4.21E-04                 |
| Cellular macromolecule biosynthetic process | 7.30E-04                 |
| Translational elongation                    | 7.63E-04                 |
| Regulation of locomotion                    | 0.001109251              |
| Multicellular organismal development        | 0.001119221              |
| Collagen fibril organization                | 0.001119221              |
| Regulation of cellular component movement   | 0.001361031              |
| Cellular biosynthetic process               | 0.001419218              |
| Skeletal system morphogenesis               | 0.001419218              |
| Developmental process                       | 0.00156327               |
| Angiogenesis                                | 0.002708858              |
| Collagen biosynthetic process               | 0.002761109              |
| Regulation of cell growth                   | 0.004425475              |
| Negative regulation of cell proliferation   | 0.004425475              |
| Cell motility                               | 0.005208333              |
| Localization of cell                        | 0.005208333              |
| Regulation of cell proliferation            | 0.006625843              |
| Oxidation-reduction process                 | 0.008819223              |

Corrected *P*-values for the selected ontologies are provided.  
GO, gene ontology; ATMs, adipose tissue-resident macrophages.
