# Supplementary material
Source: PubMed Central journal article supplement (PMC3585481)
Supplement: Supp_Table4.pdf [file Supp_Table4.pdf]

SUPPLEMENTARY TABLE S4. GO ANALYSIS OF GENES WITH 5 TIMES HIGHER EXPRESSION IN CD34<sup>+</sup>/CD206<sup>+</sup> ATMs COMPARED TO ASCs IS SHOWN

| <i>GO Term</i>                                                                            | <i>Corrected P-value</i> |
|-------------------------------------------------------------------------------------------|--------------------------|
| Immune system process                                                                     | ∞                        |
| Immune response                                                                           | ∞                        |
| Response to stimulus                                                                      | 5.43E-35                 |
| Defense response                                                                          | 1.39E-34                 |
| Inflammatory response                                                                     | 7.20E-25                 |
| Response to wounding                                                                      | 7.27E-23                 |
| Signal transduction                                                                       | 7.03E-20                 |
| Cell communication                                                                        | 5.04E-19                 |
| Signaling                                                                                 | 6.49E-19                 |
| Response to stress                                                                        | 7.62E-17                 |
| Cellular response to stimulus                                                             | 4.16E-16                 |
| Antigen processing and presentation of peptide or polysaccharide antigen via MHC class II | 5.08E-16                 |
| Regulation of immune system process                                                       | 3.32E-14                 |
| Cell activation                                                                           | 6.80E-13                 |
| Positive regulation of immune system process                                              | 8.81E-12                 |
| Leukocyte activation                                                                      | 1.15E-11                 |
| Regulation of immune response                                                             | 2.78E-11                 |
| Chemotaxis                                                                                | 3.22E-11                 |
| Taxis                                                                                     | 3.22E-11                 |
| Regulation of response to stimulus                                                        | 6.19E-11                 |
| Locomotion                                                                                | 1.42E-10                 |
| Response to external stimulus                                                             | 5.71E-09                 |
| Positive regulation of immune response                                                    | 1.92E-08                 |
| Antigen processing and presentation                                                       | 2.02E-08                 |
| Response to other organism                                                                | 5.02E-08                 |
| Myeloid leukocyte activation                                                              | 5.04E-08                 |
| Regulation of cell activation                                                             | 5.06E-08                 |
| Biological regulation                                                                     | 6.63E-08                 |
| Regulation of leukocyte activation                                                        | 6.99E-08                 |
| Response to bacterium                                                                     | 1.36E-07                 |
| Response to biotic stimulus                                                               | 1.42E-07                 |
| Regulation of biological process                                                          | 1.48E-07                 |
| Immune effector process                                                                   | 1.57E-07                 |
| Leukocyte migration                                                                       | 6.88E-07                 |
| Regulation of lymphocyte differentiation                                                  | 8.76E-07                 |
| Endocytosis                                                                               | 1.05E-06                 |
| Response to cytokine stimulus                                                             | 1.34E-06                 |
| Leukocyte cell-cell adhesion                                                              | 1.38E-06                 |
| Regulation of cellular process                                                            | 2.35E-06                 |
| Leukocyte differentiation                                                                 | 2.83E-06                 |
| Regulation of lymphocyte activation                                                       | 3.08E-06                 |
| Cell surface receptor signaling pathway                                                   | 3.10E-06                 |
| Lymphocyte activation                                                                     | 3.27E-06                 |
| Hemopoietic or lymphoid organ development                                                 | 3.84E-06                 |
| Phagocytosis                                                                              | 4.37E-06                 |
| Positive regulation of response to stimulus                                               | 4.37E-06                 |
| Response to chemical stimulus                                                             | 4.67E-06                 |
| Hemopoiesis                                                                               | 4.69E-06                 |
| Regulation of T cell differentiation                                                      | 5.55E-06                 |
| Positive regulation of lymphocyte differentiation                                         | 5.82E-06                 |
| Positive regulation of molecular function                                                 | 7.53E-06                 |
| Cellular response to cytokine stimulus                                                    | 7.64E-06                 |
| Cell adhesion                                                                             | 7.75E-06                 |
| Biological adhesion                                                                       | 8.01E-06                 |

(continued)

SUPPLEMENTARY TABLE S4. (CONTINUED)

| <i>GO Term</i>                                                     | <i>Corrected P-value</i> |
|--------------------------------------------------------------------|--------------------------|
| T cell activation                                                  | 8.01E-06                 |
| Immune response-regulating signaling pathway                       | 1.11E-05                 |
| Immune system development                                          | 1.36E-05                 |
| Multiorganism process                                              | 1.63E-05                 |
| Regulation of signal transduction                                  | 1.97E-05                 |
| Positive regulation of T cell differentiation                      | 2.30E-05                 |
| Cytokine-mediated signaling pathway                                | 2.83E-05                 |
| Regulation of cytokine production                                  | 3.57E-05                 |
| Response to organic substance                                      | 3.57E-05                 |
| Regulation of molecular function                                   | 3.88E-05                 |
| Positive regulation of catalytic activity                          | 3.99E-05                 |
| Positive regulation of hydrolase activity                          | 4.51E-05                 |
| Activation of immune response                                      | 4.91E-05                 |
| Integrin-mediated signaling pathway                                | 5.28E-05                 |
| Cellular defense response                                          | 6.45E-05                 |
| Regulation of hydrolase activity                                   | 6.62E-05                 |
| Positive regulation of cell activation                             | 6.68E-05                 |
| Regulation of catalytic activity                                   | 7.27E-05                 |
| Regulation of defense response                                     | 7.27E-05                 |
| Cytokine secretion                                                 | 7.27E-05                 |
| Regulation of immune effector process                              | 8.18E-05                 |
| Regulation of T cell activation                                    | 1.10E-04                 |
| Cytokine production                                                | 1.26E-04                 |
| Lymphocyte differentiation                                         | 1.53E-04                 |
| Positive regulation of leukocyte activation                        | 1.56E-04                 |
| Positive regulation of biological process                          | 1.56E-04                 |
| Regulation of multicellular organismal process                     | 1.62E-04                 |
| Regulation of signaling                                            | 1.64E-04                 |
| Regulation of developmental process                                | 2.05E-04                 |
| Response to molecule of bacterial origin                           | 2.40E-04                 |
| Humoral immune response                                            | 2.41E-04                 |
| Regulation of leukocyte mediated immunity                          | 2.67E-04                 |
| Regulation of multicellular organismal development                 | 2.67E-04                 |
| Defense response to bacterium                                      | 3.72E-04                 |
| Response to lipopolysaccharide                                     | 4.42E-04                 |
| Positive regulation of alpha-beta T cell activation                | 4.82E-04                 |
| Cellular component movement                                        | 5.25E-04                 |
| Positive regulation of defense response                            | 5.82E-04                 |
| Intracellular signal transduction                                  | 5.82E-04                 |
| Neutrophil chemotaxis                                              | 6.40E-04                 |
| Positive regulation of alpha-beta T cell differentiation           | 6.40E-04                 |
| Immune response-activating signal transduction                     | 6.49E-04                 |
| Regulation of cytokine biosynthetic process                        | 9.36E-04                 |
| Regulation of response to stress                                   | 0.001009593              |
| Positive regulation of T cell activation                           | 0.001077212              |
| Immune response-regulating cell surface receptor signaling pathway | 0.001113145              |
| Leukocyte chemotaxis                                               | 0.001120852              |
| Cellular response to chemical stimulus                             | 0.001575736              |
| Regulation of cell communication                                   | 0.001782856              |
| Regulation of interleukin-6 production                             | 0.001805702              |

(continued)

SUPPLEMENTARY TABLE S4. (CONTINUED)

| <i>GO Term</i>                                                                                                                                   | <i>Corrected P-value</i> |
|--------------------------------------------------------------------------------------------------------------------------------------------------|--------------------------|
| Cell activation involved in immune response                                                                                                      | 0.001993049              |
| Leukocyte activation involved in immune response                                                                                                 | 0.001993049              |
| Receptor-mediated endocytosis                                                                                                                    | 0.002200685              |
| Positive regulation of developmental process                                                                                                     | 0.002200685              |
| Cell chemotaxis                                                                                                                                  | 0.002200685              |
| Positive regulation of cellular process                                                                                                          | 0.002291025              |
| Vesicle-mediated transport                                                                                                                       | 0.002429623              |
| Regulation of alpha-beta T cell differentiation                                                                                                  | 0.002570316              |
| Negative regulation of response to stimulus                                                                                                      | 0.002570316              |
| Positive regulation of cytokine biosynthetic process                                                                                             | 0.002740176              |
| Regulation of programmed cell death                                                                                                              | 0.003240427              |
| Regulation of localization                                                                                                                       | 0.003245588              |
| T cell differentiation                                                                                                                           | 0.003421228              |
| Regulation of cell death                                                                                                                         | 0.003531571              |
| Positive regulation of lymphocyte activation                                                                                                     | 0.003531571              |
| Regulation of humoral immune response                                                                                                            | 0.003613442              |
| Negative regulation of signal transduction                                                                                                       | 0.003613442              |
| Regulation of GTP catabolic process                                                                                                              | 0.003891622              |
| Purinergic nucleotide receptor signaling pathway                                                                                                 | 0.003891622              |
| Regulation of GTPase activity                                                                                                                    | 0.003891622              |
| Icosanoid biosynthetic process                                                                                                                   | 0.003891622              |
| Positive regulation of adaptive immune response based on somatic recombination of immune receptors built from immunoglobulin superfamily domains | 0.00430254               |
| Regulation of inflammatory response                                                                                                              | 0.004514677              |
| Regulation of alpha-beta T cell activation                                                                                                       | 0.004796446              |
| Regulation of MAP kinase activity                                                                                                                | 0.004937568              |
| Programmed cell death                                                                                                                            | 0.005048261              |
| Positive regulation of adaptive immune response                                                                                                  | 0.005361815              |
| Positive regulation of cholesterol storage                                                                                                       | 0.005361815              |
| Negative regulation of signaling                                                                                                                 | 0.005361815              |
| Regulation of homeostatic process                                                                                                                | 0.005361815              |
| G-protein coupled purinergic nucleotide receptor signaling pathway                                                                               | 0.005361815              |
| Regulation of gamma-delta T cell differentiation                                                                                                 | 0.005361815              |
| Positive regulation of gamma-delta T cell differentiation                                                                                        | 0.005361815              |
| Regulation of gamma-delta T cell activation                                                                                                      | 0.005361815              |
| Positive regulation of gamma-delta T cell activation                                                                                             | 0.005361815              |
| Chemokine-mediated signaling pathway                                                                                                             | 0.005361815              |

(continued)

SUPPLEMENTARY TABLE S4. (CONTINUED)

| <i>GO Term</i>                                                                                                                          | <i>Corrected P-value</i> |
|-----------------------------------------------------------------------------------------------------------------------------------------|--------------------------|
| Negative regulation of cell communication                                                                                               | 0.005416574              |
| Positive regulation of multicellular organismal process                                                                                 | 0.005416574              |
| Regulation of intracellular protein kinase cascade                                                                                      | 0.006412205              |
| Unsaturated fatty acid biosynthetic process                                                                                             | 0.006811583              |
| Regulation of innate immune response                                                                                                    | 0.006811583              |
| Regulation of adaptive immune response based on somatic recombination of immune receptors built from immunoglobulin superfamily domains | 0.006869566              |
| Positive regulation of cytokine production                                                                                              | 0.00708369               |
| Apoptotic process                                                                                                                       | 0.007268565              |
| Regulation of apoptotic process                                                                                                         | 0.007500938              |
| Elevation of cytosolic calcium ion concentration                                                                                        | 0.007600843              |
| Regulation of response to external stimulus                                                                                             | 0.007642637              |
| Regulation of adaptive immune response                                                                                                  | 0.007895952              |
| Icosanoid metabolic process                                                                                                             | 0.007895952              |
| Positive regulation of innate immune response                                                                                           | 0.008009519              |
| Negative regulation of immune system process                                                                                            | 0.008068467              |
| Positive regulation of cell communication                                                                                               | 0.008068467              |
| Positive regulation of signaling                                                                                                        | 0.008068467              |
| Positive regulation of MAP kinase activity                                                                                              | 0.008068467              |
| Regulation of nitric oxide biosynthetic process                                                                                         | 0.008068467              |
| Regulation of catabolic process                                                                                                         | 0.008303124              |
| Cell migration                                                                                                                          | 0.008339778              |
| Regulation of CD4-positive, CD25-positive, alpha-beta regulatory T cell differentiation                                                 | 0.008655869              |
| Positive regulation of CD4-positive, CD25-positive, alpha-beta regulatory T cell differentiation                                        | 0.008655869              |
| Fc receptor signaling pathway                                                                                                           | 0.008655869              |
| Positive regulation of GTPase activity                                                                                                  | 0.008655869              |
| Regulation of biological quality                                                                                                        | 0.008798162              |
| Purinergic receptor signaling pathway                                                                                                   | 0.009140613              |
| Small molecule biosynthetic process                                                                                                     | 0.009377632              |
| Regulation of nucleotide catabolic process                                                                                              | 0.009520843              |
| Regulation of purine nucleotide catabolic process                                                                                       | 0.009520843              |

Corrected P-values for the selected ontologies are provided.
